# Supplementary material
Source: MDPI journal article supplement (https://www.mdpi.com/2308-3417/9/1/15)
Supplement: s1 [file s1]

## Supplemental File S1

### Generic name and ATC code for each drug type

List of generic names and drug codes for drugs on the list of drugs requiring particular caution

\*ATC code does not exist.

#### • STOPP-J-covered drugs

| Classification | Drug (class or generic name) | English generic name                       | NHI drug price<br>Listed drug code | ATC code |
|----------------|------------------------------|--------------------------------------------|------------------------------------|----------|
| Antipsychotics | Typical antipsychotics       | Oxypertine                                 | 1179011                            | N05AE01  |
|                |                              | Clomacramine hydrochloride                 | 1179030                            | N05AX    |
|                |                              | Chlorpromazine phenolphthalinate           | 1171005                            | N05AA01  |
|                |                              | Chlorpromazine hydrochloride               | 1171001                            | N05AA01  |
|                |                              | Spiperone                                  | 1179015                            | N05AD    |
|                |                              | Sulthiame hydrochloride                    | 1179032                            | N05AL02  |
|                |                              | Zotepine                                   | 1179024                            | N05AX11  |
|                |                              | Tiapride hydrochloride                     | 1190004                            | N05AL03  |
|                |                              | Timiperone                                 | 1179026                            | N05AD    |
|                |                              | Nemonapride                                | 1179036                            | N05AL    |
|                |                              | Haloperidol                                | 1179020                            | N05AD01  |
|                |                              | Pipamperone (fluoropipamide hydrochloride) | 1179006                            | N05AD05  |
|                |                              | Pimozide                                   | 1179022                            | N05AG02  |
|                |                              | Fluphenazine maleate                       | 1172009                            | N05AB02  |
|                |                              | Prochlorperazine maleate                   | 1172010                            | N05AB04  |
|                |                              | Propisephine                               | 1172005                            | N05AC01  |
|                |                              | Bromperidol                                | 1179028                            | N05AD06  |
|                |                              | Perphenazine                               | 1172006<br>1172007                 | N05AB03  |
|                |                              | Perphenazine fendizoate                    | 1172004                            | N05AB03  |
|                |                              | Perphenazine maleate                       | 1172013                            | N05AB03  |
|                |                              | Mosapramine hydrochloride                  | 1179035                            | N05AX10  |
|                |                              | Levomepromazine maleate                    | 1172014                            | N05AA02  |
| Antipsychotics | Atypical antipsychotics      | Asenapine maleate                          | 1179056                            | N05AH05  |
|                |                              | Aripiprazole                               | 1179045                            | N05AX12  |
|                |                              | Olanzapine                                 | 1179044                            | N05AH03  |
|                |                              | Quetiapine fumarate                        | 1179042                            | N05AH04  |

|                                                                |                                           |                                          |                    |         |
|----------------------------------------------------------------|-------------------------------------------|------------------------------------------|--------------------|---------|
| Antidepressants                                                | Tricyclic antidepressants                 | Clozapine                                | 1179049            | N05AH02 |
|                                                                |                                           | Paliperidone                             | 1179053            | N05AX13 |
|                                                                |                                           | Blonanserin                              | 1179048            | N05AX   |
|                                                                |                                           | Perospirone hydrochloride hydrate        | 1179043            | N05AX   |
|                                                                |                                           | Risperidone                              | 1179038            | N05AX08 |
|                                                                |                                           | Amitriptyline hydrochloride              | 1179002            | N06AA09 |
|                                                                |                                           | Amoxapine                                | 1179001            | N06AA17 |
|                                                                |                                           | Imipramine hydrochloride                 | 1174006            | N06AA02 |
|                                                                |                                           | Clomipramine hydrochloride               | 1174002            | N06AA04 |
|                                                                |                                           | Dosulepin hydrochloride                  | 1179027            | N06AA16 |
|                                                                |                                           | Trimipramine maleate                     | 1174005            | N06AA06 |
|                                                                |                                           | Nortriptyline hydrochloride              | 1179004            | N06AA10 |
|                                                                |                                           | Lofepramine hydrochloride                | 1174004            | N06AA07 |
|                                                                |                                           | Escitalopram oxalate                     | 1179054            | N06AB10 |
| Antidepressants                                                | Selective serotonin receptor antagonists  | Paroxetine hydrochloride hemihydrate     | 1179041            | N06AB05 |
|                                                                |                                           | Flupentixol maleate                      | 1179039            | N06AB08 |
|                                                                |                                           | Sertraline hydrochloride                 | 1179046            | N06AB06 |
| Sulpiride                                                      | Sulpiride                                 | Sulpiride                                | 1179016<br>2329009 | N05AL01 |
| Antiparkinsonian drugs                                         | Antiparkinsonian drugs (anticholinergics) | Trihexyphenidyl hydrochloride            | 1169001<br>1169002 | N04AA01 |
|                                                                |                                           | Biperiden hydrochloride                  | 1162001            | N04AA02 |
|                                                                |                                           | Pyroheptine hydrochloride                | 1169003            | N04AA   |
|                                                                |                                           | Prophephenamine hibenazate               | 1163002            | N04AA05 |
|                                                                |                                           | Prophephenamine hydrochloride            | 1163001            | N04AA05 |
|                                                                |                                           | Promethazine hydrochloride               | 4413002            | R06AD02 |
|                                                                |                                           | Promethazine hibenazate                  | 4413002            | R06AD02 |
|                                                                |                                           | Promethazine methylenedisalicylate       | 4413002            | R06AD02 |
|                                                                |                                           | Methacholine chloride hemihydrate        | 1169004            | N04AA10 |
| Systemic corticosteroids                                       | Oral steroids                             | Cortisone acetate                        | 2452001            | H02AB10 |
|                                                                |                                           | Dexamethasone                            | 2454002            | H02AB02 |
|                                                                |                                           | Triamcinolone                            | 2454003            | H02AB08 |
|                                                                |                                           | Hydrocortisone                           | 2452002            | H02AB09 |
|                                                                |                                           | Prednisolone                             | 2456001<br>2456002 | H02AB06 |
|                                                                |                                           | Betamethasone                            | 2454004            | H02AB01 |
|                                                                |                                           | Methylprednisolone                       | 2456003            | H02AB04 |
|                                                                |                                           | Betamethasone D-chlorpheniramine maleate | 2459100            | *       |
|                                                                |                                           | Aspirin                                  | 3399007            | B01AC06 |
|                                                                |                                           | Clopidogrel sulfate                      | 3399008            | B01AC04 |
| Antithrombotic agents (antiplatelet agents and anticoagulants) | Antiplatelet agents                       | Cilostazol                               | 3399002            | B01AC23 |
|                                                                |                                           | Ticagrelor                               | 3399011            | B01AC24 |

|                                                                      |                                                                                                |                                                                                                |                    |                    |         |
|----------------------------------------------------------------------|------------------------------------------------------------------------------------------------|------------------------------------------------------------------------------------------------|--------------------|--------------------|---------|
| Antithrombotic agents<br>(antiplatelet agents<br>and anticoagulants) | Aspirin                                                                                        | Ticlopidine hydrochloride                                                                      | 3399001            | B01AC05            |         |
|                                                                      |                                                                                                | Prasugrel hydrochloride                                                                        | 3399009            | B01AC22            |         |
|                                                                      |                                                                                                | Aspirin<br>Dihydroxyaluminum aminoacetate<br>Magnesium carbonate                               | 3399100            | *                  |         |
|                                                                      |                                                                                                | Aspirin<br>Clopidogrel bisulfate                                                               | 3399101            | *                  |         |
|                                                                      |                                                                                                | Aspirin<br>Lansoprazole                                                                        | 3399102            | *                  |         |
|                                                                      |                                                                                                | Aspirin                                                                                        | 1143001<br>3399007 | N02BA01<br>B01AC06 |         |
|                                                                      |                                                                                                | Aspirin<br>Dihydroxyaluminum aminoacetate<br>Magnesium carbonate                               | 1143010<br>3399100 | *                  |         |
|                                                                      |                                                                                                | Aspirin<br>Clopidogrel bisulfate                                                               | 3399101            | *                  |         |
|                                                                      |                                                                                                | Aspirin<br>Lansoprazole                                                                        | 3399102            | *                  |         |
|                                                                      |                                                                                                | Combination of multiple<br>antithrombotic drugs<br>(antiplatelet agents and<br>anticoagulants) | Aspirin            | 3399007            | B01AC06 |
|                                                                      | Clopidogrel sulfate                                                                            |                                                                                                | 3399008            | B01AC04            |         |
|                                                                      | Cilostazol                                                                                     |                                                                                                | 3399002            | B01AC23            |         |
|                                                                      | Ticagrelor                                                                                     |                                                                                                | 3399011            | B01AC24            |         |
|                                                                      | Ticlopidine hydrochloride                                                                      |                                                                                                | 3399001            | B01AC05            |         |
|                                                                      | Prasugrel hydrochloride                                                                        |                                                                                                | 3399009            | B01AC22            |         |
|                                                                      | Combination of multiple<br>antithrombotic drugs<br>(antiplatelet agents and<br>anticoagulants) | Aspirin<br>Dihydroxyaluminum aminoacetate<br>Magnesium carbonate                               | 3399100            | *                  |         |
|                                                                      |                                                                                                | Aspirin<br>Clopidogrel bisulfate                                                               | 3399101            | *                  |         |
|                                                                      |                                                                                                | Aspirin<br>Lansoprazole                                                                        | 3399102            | *                  |         |
|                                                                      |                                                                                                | Apixaban                                                                                       | 3339004            | B01AF02            |         |
|                                                                      |                                                                                                | Edoxaban tosylate hydrate                                                                      | 3339002            | B01AF03            |         |
| Dabigatran etexilate mesylate                                        |                                                                                                | 3339001                                                                                        | B01AE07            |                    |         |
| Rivaroxaban                                                          |                                                                                                | 3339003                                                                                        | B01AF01            |                    |         |
| Warfarin potassium                                                   |                                                                                                | 3332001                                                                                        | B01AA03            |                    |         |
| Cardiac glycosides                                                   |                                                                                                | Digoxin                                                                                        | Digoxin            | 2113003<br>2113004 | C01AA05 |
|                                                                      |                                                                                                |                                                                                                | Azosemide          | 2139008            | C03CA   |
| Diuretic                                                             | Loop diuretics                                                                                 | Torsemide                                                                                      | 2139009            | C03CA04            |         |
|                                                                      |                                                                                                | Piretanide                                                                                     | 2139007            | C03CA03            |         |
|                                                                      |                                                                                                | Bumetanide                                                                                     | 2139004            | C03CA02            |         |
|                                                                      |                                                                                                | Furosemide                                                                                     | 2139005            | C03CA01            |         |
|                                                                      | Aldosterone antagonists                                                                        | Eplerenone                                                                                     | 2149045            | C03DA04            |         |

|                            |                                                            |                                    |                    |                    |
|----------------------------|------------------------------------------------------------|------------------------------------|--------------------|--------------------|
| Beta-blocking agents       | Non-selective beta-blockers                                | Spironolactone                     | 2133001            | C03DA01            |
|                            |                                                            | Alprenolol hydrochloride           | 2123002            | C07AA01            |
|                            |                                                            | Arotinolol hydrochloride           | 2123014            | C07AA              |
|                            |                                                            | Carteolol hydrochloride            | 2123005<br>2149025 | C07AA15            |
|                            |                                                            | Nadolol                            | 2123015            | C07AA12            |
|                            |                                                            | Nipradilol                         | 2149021            | C07AA              |
|                            |                                                            | Pindolol                           | 2123009<br>2149011 | C07AA03            |
|                            |                                                            | Bupentolol hydrochloride           | 2123006            | C07AA              |
|                            |                                                            | Propranolol hydrochloride          | 2123008<br>2149014 | C07AA05            |
|                            |                                                            | Urapidil                           | 2149020            | C02CA06            |
| Antihypertensives          | Receptor subtype nonselective<br>alpha 1 receptor blockers | Terazosin hydrochloride hydrate    | 2149023            | G04CA03            |
|                            |                                                            | Doxazosin mesylate                 | 2149026            | C02CA04            |
|                            |                                                            | Bunazosin hydrochloride            | 2149015            | C02CA              |
|                            |                                                            | Prazosin hydrochloride             | 2149002            | C02CA01            |
|                            |                                                            | D-chlorpheniramine maleate         | 4419002            | R06AB04            |
| Antihistamines             | 1 <sup>st</sup> -generation H1 receptor<br>antagonists     | Alimemazine tartrate               | 4413003            | R06AD01            |
|                            |                                                            | Clemastine fumarate                | 4419008            | R06AA04            |
|                            |                                                            | Chlorpheniramine maleate           | 4419001<br>4419003 | R06AB04            |
|                            |                                                            | Diphenhydramine                    | 4411001            | R06AA02            |
|                            |                                                            | Cyproheptadine hydrochloride       | 4419005            | R06AX02            |
|                            |                                                            | Hydroxyzine pamoate                | 1179019            | N05BB01            |
|                            |                                                            | Hydroxyzine hydrochloride          | 1179005            | N05BB01            |
|                            |                                                            | Promethazine hydrochloride         | 4413002            | R06AD02<br>D04AA10 |
|                            |                                                            | Promethazine hibenazate            | 4413002            | R06AD02<br>D04AA10 |
|                            |                                                            | Promethazine methylenedisalicylate | 4413002            | R06AD02<br>D04AA10 |
|                            |                                                            | Homochlorethyclizine hydrochloride | 4419006            | R06AE              |
|                            |                                                            | Betamethasone                      | 2459100            | *                  |
|                            |                                                            | D-chlorpheniramine maleate         |                    |                    |
|                            |                                                            | Cimetidine                         | 2325001            | A02BA01            |
|                            |                                                            | Nizatidine                         | 2325005            | A02BA04            |
| H2-receptor<br>antagonists | H2-receptor antagonists                                    | Famotidine                         | 2325003            | A02BA03            |
|                            |                                                            | Ranitidine hydrochloride           | 2325002            | A02BA02            |
|                            |                                                            | Lafutidine                         | 2325006            | A02BA08            |
|                            |                                                            | Roxatidine acetate hydrochloride   | 2325004            | A02BA06            |
|                            |                                                            | Prochlorperazine maleate           | 1172010            | N05AB04            |
| Antiemetic drugs           | Antiemetic drugs                                           | Promethazine hydrochloride         | 4413002            | R06AD02<br>D04AA10 |

|                              |                                 |                                                    |                    |                    |
|------------------------------|---------------------------------|----------------------------------------------------|--------------------|--------------------|
|                              |                                 | Promethazine hibenazate                            | 4413002            | R06AD02<br>D04AA10 |
|                              |                                 | Promethazine methylenedisalicylate                 | 4413002            | R06AD02<br>D04AA10 |
| Laxatives                    | Magnesium oxide                 | Metoclopramide                                     | 2399004            | A03FA01            |
|                              |                                 | Magnesium oxide                                    | 2344002<br>2344009 | A02AA02<br>A06AD02 |
| Antidiabetic drugs           | Sulfonylurea drugs              | Acetohexamide                                      | 3961001            | A10BB31            |
|                              |                                 | Gliclazide                                         | 3961007            | A10BB09            |
|                              |                                 | Glipizide                                          | 3961002            | A10BB              |
|                              |                                 | Glibenclamide                                      | 3961003            | A10BB01            |
|                              |                                 | Glimepiride                                        | 3961008            | A10BB12            |
|                              |                                 | Chlorpropamide                                     | 3961004            | A10BB02            |
|                              |                                 | Tolbutamide                                        | 3961006            | A10BB03            |
|                              |                                 | Glimepiride pioglitazone hydrochloride             | 3969101            | A10BD06            |
|                              | Biguanides                      | Buformin hydrochloride                             | 3962001            | A10BA03            |
|                              |                                 | Metformin hydrochloride                            | 3962002            | A10BA02            |
|                              |                                 | Metformin hydrochloride alogliptin benzoate        | 3969105            | A10BD13            |
|                              |                                 | Metformin hydrochloride vildagliptin hydrochloride | 3969104            | A10BD08            |
|                              |                                 | Metformin hydrochloride pioglitazone hydrochloride | 3969100            | A10BD05            |
|                              | Thiazolidinediones              | Pioglitazone hydrochloride                         | 3969007            | A10BG03            |
|                              |                                 | Pioglitazone hydrochloride alogliptin benzoate     | 3969103            | A10BD09            |
|                              |                                 | Pioglitazone hydrochloride glimepiride             | 3969101            | A10BD06            |
|                              |                                 | Metformin hydrochloride pioglitazone hydrochloride | 3969100            | A10BD05            |
|                              | Alpha-glucosidase inhibitors    | Acarbose                                           | 3969003            | A10BF01            |
|                              |                                 | Voglibose                                          | 3969004            | A10BF03            |
|                              |                                 | Miglitol                                           | 3969009            | A10BF02            |
|                              |                                 | Mitiglinide calcium hydrate voglibose              | 3969102            | *                  |
|                              | SGLT2 inhibitors                | Ipragliflozin L-proline                            | 3969018            | A10BK              |
|                              |                                 | Empagliflozin                                      | 3969023            | A10BK03            |
|                              |                                 | Canagliflozin hydrate                              | 3969022            | A10BK02            |
|                              |                                 | Dapagliflozin propylene glycol hydrate             | 3969019            | A10BK01            |
|                              |                                 | Tofogliflozin hydrate                              | 3969021            | A10BK              |
|                              |                                 | Luseogliflozin hydrate                             | 3969020            | A10BK              |
| Drugs for overactive bladder | Oxybutynin (oral)               | Oxybutynin hydrochloride                           | 2590005            | G04BD04            |
|                              | Muscarinic receptor antagonists | Imidafenacin                                       | 2590013            | G04BD              |
|                              |                                 | Solifenacin succinate                              | 2590011            | G04BD08            |
|                              |                                 | Tolterodine tartrate                               | 2590012            | G04BD07            |
|                              |                                 | Fesoterodine fumarate                              | 2590015            | G04BD11            |
|                              |                                 | Propiverine hydrochloride                          | 2590007            | G04BD06            |
|                              |                                 | Acemetacin                                         | 1145003            | M01AB11            |
| NSAIDs                       | NSAIDs                          | Ampiroxicam                                        | 1149030            | M01AC              |
|                              |                                 | Amfenac sodium hydrate                             | 1147006            | M01AB              |

|                           |                    |         |
|---------------------------|--------------------|---------|
| Ibuprofen                 | 1149001            | M01AE01 |
| Indomethacin              | 1145001<br>1145002 | M01AB01 |
| Indometacin farnesil      | 1145005            | M01AB01 |
| Etodolac                  | 1149032            | M01AB08 |
| Emorphazone               | 1148004            | N02BG   |
| Oxaprozin                 | 1149026            | M01AE12 |
| Zaltoprofen               | 1149029            | M01AE   |
| Diclofenac sodium         | 1147002            | M01AB05 |
| Sulindac                  | 1149015            | M01AB02 |
| Tiaprofenic acid          | 1149025            | M01AE11 |
| Tiaramide hydrochloride   | 1148001            | N02BG   |
| Nabumetone                | 1149027            | M01AX01 |
| Naproxen                  | 1149007            | M01AE02 |
| Piroxicam                 | 1149017            | M01AC01 |
| Bucloxic acid             | 1149009            | M01AX   |
| Pranoprofen               | 1149010            | S01BC09 |
| Flufenamic acid aluminum  | 1141004            | M01AG03 |
| Flurbiprofen              | 1149011            | M01AE09 |
| Proglumetacin maleate     | 1145004            | M01AB14 |
| Mefenamic acid            | 1141005            | M01AG01 |
| Meloxicam                 | 1149035            | M01AC06 |
| Mofezolac                 | 1149033            | M01AX   |
| Loxoprofen sodium hydrate | 1149019            | M01AE   |
| Lornoxicam                | 1149036            | M01AC05 |

<Notes for patients eligible according to STOPP-J>

When each medication on this list is used in an ‘eligible patient population’, it should be administered with ‘special caution’; however, since the intent of the administration is unknown, the eligibility of patients receiving each of these medications according to STOPP-J should be considered.

#### • Benzodiazepines

| Classification                  | Drug (class or generic name) | English generic name | NHI drug price<br>Listed drug code | ATC code |
|---------------------------------|------------------------------|----------------------|------------------------------------|----------|
| Sleep-inducing<br>tranquilizers | Benzodiazepines              | Alprazolam           | 1124023                            | N05BA12  |
|                                 |                              | Estazolam            | 1124001                            | N05CD04  |
|                                 |                              | Etizolam             | 1179025                            | N05BA19  |
|                                 |                              | Oxazolam             | 1124013                            | N05BA    |
|                                 |                              | Quazepam             | 1124030                            | N05CD10  |
|                                 |                              | Cloxacolam           | 1124014                            | N05BA22  |
|                                 |                              | Clotiazepam          | 1179012                            | N05BA21  |

|  |                     |                                    |         |         |
|--|---------------------|------------------------------------|---------|---------|
|  |                     | Potassium clorazepate              | 1124015 | N05BA05 |
|  |                     | Clonazepam                         | 1139003 | N03AE01 |
|  |                     | Clobazam                           | -       | N05BA09 |
|  |                     | Chlordiazepoxide                   | 1124028 | N05BA02 |
|  |                     | Diazepam                           | 1124017 | N05BA01 |
|  |                     | Tofisopam                          | 1124026 | N05BA23 |
|  |                     | Triazolam                          | 1124007 | N05CD05 |
|  |                     | Nitrazepam                         | 1124003 | N05CD02 |
|  |                     | Nimetazepam                        | 1124004 | N05BA   |
|  |                     | Haloxazolam                        | 1124005 | N05CD   |
|  |                     | Fludiazepam                        | 1124019 | N05BA17 |
|  |                     | Flutazolam                         | 1124024 | N05BA   |
|  |                     | Flutoprazepam                      | 1124027 | N05BA   |
|  |                     | Flunitrazepam                      | 1124008 | N05CD03 |
|  |                     | Flurazepam hydrochloride           | 1124002 | N05CD01 |
|  |                     | Brotizolam                         | 1124009 | N05CD09 |
|  |                     | Brotizolam                         | 1124020 | N05BA08 |
|  |                     | Mexazolam                          | 1124025 | N05BA   |
|  |                     | Medazepam                          | 1124021 | N05BA03 |
|  |                     | Midazolam                          | 1139700 | N05CD08 |
|  |                     | Lormetazepam hydrochloride hydrate | 1129006 | N05CD   |
|  |                     | Ethyl loflazepate                  | 1124029 | N05BA18 |
|  |                     | Lorazepam                          | 1124022 | N05BA06 |
|  |                     | Lormetazepam                       | 1124010 | N05CD06 |
|  | Non-benzodiazepines | Eszopiclone                        | 1129010 | N05CF04 |
|  |                     | Zopiclone                          | 1129007 | N05CF01 |
|  |                     | Zolpidem                           | 1129009 | N05CF02 |
|  |                     |                                    |         |         |

• Proton pump inhibitors

| Classification         | Drug (class or generic name) | English generic name                    | NHI drug price<br>Listed drug code | ATC code |
|------------------------|------------------------------|-----------------------------------------|------------------------------------|----------|
| Proton pump inhibitors | Proton pump inhibitors       | Omeprazole                              | 2329022                            | A02BC01  |
|                        |                              | Lansoprazole                            | 2329023                            | A02BC03  |
|                        |                              | Rabeprazole sodium                      | 2329028                            | A02BC04  |
|                        |                              | Esomeprazole magnesium hydrate          | 2329029                            | A02BC05  |
|                        |                              | Vonoprazan fumarate                     | 2329030                            | A02BC08  |
|                        |                              | Aspirin-Lansoprazole combination        | 3399102                            | *        |
|                        |                              | Aspirin-Vonoprazan fumarate combination | 3399103                            | *        |

• HMG CoA reductase inhibitors





|                                    |              |      |       |     |       |     |       |         |     |       |     |         |         |     |       |         |       |         |  |
|------------------------------------|--------------|------|-------|-----|-------|-----|-------|---------|-----|-------|-----|---------|---------|-----|-------|---------|-------|---------|--|
| Age, years                         |              |      |       |     |       |     |       | 0.0135* |     |       |     | 0.0202* |         |     |       | 0.0568* |       |         |  |
|                                    | ≤74          | 186  | 15.6% | 55  | 20.6% | 131 | 14.2% |         | 85  | 17.3% | 101 | 14.5%   |         | 124 | 16.5% | 62      | 14.1% |         |  |
|                                    | 75-84        | 477  | 40.1% | 91  | 34.1% | 386 | 41.8% |         | 174 | 35.4% | 303 | 43.4%   |         | 281 | 37.5% | 196     | 44.4% |         |  |
|                                    | ≥85          | 528  | 44.3% | 121 | 45.3% | 407 | 44.1% |         | 233 | 47.4% | 295 | 42.2%   |         | 345 | 46.0% | 183     | 41.5% |         |  |
| BMI category classification, n (%) |              |      |       |     |       |     |       | 0.0280* |     |       |     | 0.0121* |         |     |       | 0.0162* |       |         |  |
|                                    | <18.5        | 197  | 16.5% | 55  | 20.6% | 142 | 15.4% |         | 94  | 19.1% | 103 | 14.7%   |         | 138 | 18.4% | 59      | 13.4% |         |  |
|                                    | ≥18.5 to <25 | 716  | 60.1% | 163 | 61.1% | 553 | 59.9% |         | 302 | 61.4% | 414 | 59.2%   |         | 453 | 60.4% | 263     | 59.6% |         |  |
|                                    | ≥25          | 278  | 23.3% | 49  | 18.4% | 229 | 24.8% |         | 96  | 19.5% | 182 | 26.0%   |         | 159 | 21.2% | 119     | 27.0% |         |  |
| Length of hospital stay , days     |              |      |       |     |       |     |       | 0.4102* |     |       |     | 0.3262* |         |     |       | 0.3988* |       |         |  |
|                                    | Less than 7  | 340  | 28.6% | 82  | 30.7% | 258 | 27.9% |         | 144 | 29.3% | 196 | 28.0%   |         | 226 | 30.1% | 114     | 25.8% |         |  |
|                                    | 8-14         | 273  | 22.9% | 67  | 25.1% | 206 | 22.3% |         | 123 | 25.0% | 150 | 21.5%   |         | 172 | 22.9% | 101     | 22.9% |         |  |
|                                    | 15-25        | 281  | 23.6% | 60  | 22.5% | 221 | 23.9% |         | 113 | 23.0% | 168 | 24.0%   |         | 173 | 23.1% | 108     | 24.5% |         |  |
|                                    | >26          | 297  | 24.9% | 58  | 21.7% | 239 | 25.9% |         | 112 | 22.8% | 185 | 26.5%   |         | 179 | 23.9% | 118     | 26.8% |         |  |
| Hospitalisation pathway, n (%)     |              |      |       |     |       |     |       | 0.1408* |     |       |     | 0.1381* |         |     |       | 0.0273* |       |         |  |
|                                    | Household    | 1060 | 89.0% | 231 | 86.5% | 829 | 89.7% |         | 430 | 87.4% | 630 | 90.1%   |         | 656 | 87.5% | 404     | 91.6% |         |  |
|                                    | Transfer     | 131  | 11.0% | 36  | 13.5% | 95  | 10.3% |         | 62  | 12.6% | 69  | 9.9%    |         | 94  | 12.5% | 37      | 8.4%  |         |  |
| Emergency hospitalisation, n (%)   |              | 738  | 62.0% | 177 | 66.3% | 561 | 60.7% | 0.0982* | 320 | 65.0% | 418 | 59.8%   | 0.0666* | 477 | 63.6% | 261     | 59.2% | 0.1295* |  |
| Discharge destination, n (%)       |              |      |       |     |       |     |       | 0.0013* |     |       |     | 0.0028* |         |     |       | 0.0009* |       |         |  |
|                                    | Household    | 868  | 72.9% | 174 | 65.2% | 694 | 75.1% |         | 336 | 68.3% | 532 | 76.1%   |         | 522 | 69.6% | 346     | 78.5% |         |  |
|                                    | Transfer     | 323  | 27.1% | 93  | 34.8% | 230 | 24.9% |         | 156 | 31.7% | 167 | 23.9%   |         | 228 | 30.4% | 95      | 21.5% |         |  |
| Patient co-payment rate            |              |      |       |     |       |     |       | 0.0194* |     |       |     | 0.0042* |         |     |       | 0.0045* |       |         |  |
|                                    | 0%           | 64   | 5.4%  | 12  | 4.5%  | 52  | 5.6%  |         | 16  | 3.3%  | 48  | 6.9%    |         | 31  | 4.1%  | 33      | 7.5%  |         |  |

|                                             |        |         |       |      |         |      |          |         |      |         |      |          |         |      |         |      |          |         |
|---------------------------------------------|--------|---------|-------|------|---------|------|----------|---------|------|---------|------|----------|---------|------|---------|------|----------|---------|
|                                             | 10%    | 930     | 78.1% | 196  | 73.4%   | 734  | 79.4%    |         | 381  | 77.4%   | 549  | 78.5%    |         | 580  | 77.3%   | 350  | 79.4%    |         |
|                                             | 30%    | 197     | 16.5% | 59   | 22.1%   | 138  | 14.9%    |         | 95   | 19.3%   | 102  | 14.6%    |         | 139  | 18.5%   | 58   | 13.1%    |         |
| Charlson Comorbidity Index, n (%)           |        |         |       |      |         |      | 0.0003*  |         |      |         |      | <.0001*  |         |      |         |      | <.0001*  |         |
|                                             | 0      | 120     | 10.1% | 37   | 13.9%   | 83   | 9.0%     |         | 62   | 12.6%   | 58   | 8.3%     |         | 88   | 11.7%   | 32   | 7.3%     |         |
|                                             | 1 or 2 | 686     | 57.6% | 169  | 63.3%   | 517  | 56.0%    |         | 305  | 62.0%   | 381  | 54.5%    |         | 448  | 59.7%   | 238  | 54.0%    |         |
|                                             | ≥3     | 385     | 32.3% | 61   | 22.8%   | 324  | 35.1%    |         | 125  | 25.4%   | 260  | 37.2%    |         | 214  | 28.5%   | 171  | 38.8%    |         |
| Comorbidities, n (%)                        |        |         |       |      |         |      |          |         |      |         |      |          |         |      |         |      |          |         |
| Connective tissue disease-rheumatic disease | 22     |         | 1.9%  | 4    | 4.8%    | 18   | 3.7%     | 0.6306* | 6    | 3.6%    | 16   | 4.0%     | 0.1771* | 8    | 1.1%    | 14   | 3.2%     | 0.0091* |
| Peptic ulcer disease                        | 97     |         | 8.1%  | 17   | 20.5%   | 80   | 16.6%    | 0.2280* | 33   | 19.9%   | 64   | 16.0%    | 0.1282* | 52   | 6.9%    | 45   | 10.2%    | 0.0463* |
| Diabetes without complications              | 279    |         | 23.4% | 45   | 54.2%   | 234  | 48.5%    | 0.004*  | 89   | 53.6%   | 190  | 47.6%    | 0.0003* | 159  | 21.2%   | 120  | 27.2%    | 0.0180* |
| Diabetes with complications                 | 77     |         | 6.5%  | 4    | 4.8%    | 73   | 15.1%    | 0.0002* | 12   | 7.2%    | 65   | 16.3%    | <.0001* | 28   | 3.7%    | 49   | 11.1%    | <.0001* |
| Renal disease                               | 90     |         | 7.6%  | 13   | 15.7%   | 77   | 16.0%    | 0.0592* | 26   | 15.7%   | 64   | 16.0%    | 0.0128* | 47   | 6.3%    | 43   | 9.8%     | 0.0280* |
| Concomitant medication, n (%)               |        |         |       |      |         |      |          |         |      |         |      |          |         |      |         |      |          |         |
| Antithrombotic agents                       | 894    |         | 75.1% | 174  | 65.2%   | 720  | 77.9%    | <.0001* | 327  | 66.5%   | 567  | 81.1%    | <.0001* | 531  | 70.8%   | 363  | 82.3%    | <.0001* |
| Benzodiazepines                             | 152    |         | 12.8% | 10   | 3.7%    | 142  | 15.4%    | <.0001* | 27   | 5.5%    | 125  | 17.9%    | <.0001* | 56   | 7.5%    | 96   | 21.8%    | <.0001* |
| STOPP-J***                                  | 167    |         | 14.0% | 15   | 5.6%    | 152  | 16.5%    | <.0001* | 49   | 10.0%   | 118  | 16.9%    | <.0001* | 90   | 12.0%   | 77   | 17.5%    | 0.0088* |
| Proton pump inhibitors                      | 799    |         | 67.1% | 107  | 40.1%   | 692  | 74.9%    | <.0001* | 250  | 50.8%   | 549  | 78.5%    | <.0001* | 427  | 56.9%   | 372  | 84.4%    | <.0001* |
| Statins                                     | 410    |         | 34.4% | 35   | 13.1%   | 375  | 40.6%    | <.0001* | 99   | 20.1%   | 311  | 44.5%    | <.0001* | 197  | 26.3%   | 213  | 48.3%    | <.0001* |
| Number of medications, median (IQR)         |        |         |       |      |         |      | <.0001** |         |      |         |      | <.0001** |         |      |         |      | <.0001** |         |
|                                             | 8.0    | (6-11)  |       | 4.0  | (3-5)   | 9.0  | (8-12)   |         | 5.0  | (4-6)   | 10.0 | (9-12)   |         | 6.0  | (4-8)   | 12.0 | (10-14)  |         |
| DASC-21 total scores, median (IQR)          |        |         |       |      |         |      | 0.8235** |         |      |         |      | 0.6990** |         |      |         |      | 0.2165** |         |
|                                             | 28.0   | (23-45) |       | 28.0 | (22-51) | 28.5 | (23-44)  |         | 28.5 | (22-50) | 28.0 | (23-43)  |         | 29.0 | (23-48) | 28.0 | (23-41)  |         |

DASC-21 dementia severity 4

classification

0.0005\*

0.0003\*

0.0036\*

|          |     |       |     |       |     |       |     |       |     |       |     |       |     |       |
|----------|-----|-------|-----|-------|-----|-------|-----|-------|-----|-------|-----|-------|-----|-------|
| Normal   | 649 | 54.5% | 146 | 54.7% | 503 | 54.4% | 262 | 53.3% | 387 | 55.4% | 397 | 52.9% | 252 | 57.1% |
| Mild     | 158 | 13.3% | 24  | 9.0%  | 134 | 14.5% | 56  | 11.4% | 102 | 14.6% | 94  | 12.5% | 64  | 14.5% |
| Moderate | 351 | 29.5% | 81  | 30.3% | 270 | 29.2% | 149 | 30.3% | 202 | 28.9% | 229 | 30.5% | 122 | 27.7% |
| Severe   | 33  | 2.8%  | 16  | 6.0%  | 17  | 1.8%  | 25  | 5.1%  | 8   | 1.1%  | 30  | 4.0%  | 3   | 0.7%  |

\*Chi-square test (Pearson test), \*\*Mann-Whitney *U* test, \*\*\*STOPP-J (except benzodiazepines), Statins: HMG-CoA reductase inhibitors

ATC: Anatomical Therapeutic Classification, STOPP-J: Screening Tool for Older Person's Appropriate Prescriptions for Japanese, NHI: National Health Insurance, SGLT2: sodium glucose cotransporter 2, NSAIDs: nonsteroidal anti-inflammatory drugs, HMG CoA: 3-hydroxy-3-methylglutaryl-coenzyme A, BMI: body mass index, IQR: interquartile range, DASC-21: Dementia Assessment Sheet for Community-based Integrated Care System 21-Items
